# Supplementary material
Source: Research Square preprint supplement (doi:10.21203/rs.3.rs-8281694/v1)
Supplement: Supplementary file 1 [file 76754c9efdfd013890846841.xlsx]

## Sheet: WRT+Recommendations+Present(Tab
Year	Test ID	Variety Name	Wheat Class	Developer / Sponsor	Notes	Reg. No.	Published Description	Link
2015	PT472	--	CWRS	AAFC Winnipeg	--	NR	--
2009	BW878	5604HR CL	CWRS	Syngenta	AhasL-D1	6962	--
2012	BW918	5605HR CL	CWRS (CNHR 2021)	Syngenta	AhasL-D1, reclass 2021	7408	--
2000	HY961	5700PR	CPSR	AgriPro & United Grain Growers	--	5239	--
2001	HY962	5701PR	CPSR	AgriPro & Agricore United	--	5396	--
2007	HY977	5702PR	CPSR	Syngenta	--	6366	--
2016	GP151	AAC Awesome (VB)	CWSP (spring)	AAFC Lethbridge	Sm1	8088	CJPS 102: 265-271 (2022)	Link
2011	BW901	AAC Bailey	CWRS	AAFC Swift Current	--	7218	CJPS 94: 175-181 (2014) Link
2012	BW932	AAC Brandon	CWRS	AAFC Swift Current	--	7361	CJPS 97: 393-401 (2017) Link
2014	DT840	AAC Cabri	CWAD	AAFC Swift Current	solid stem	7590	CJPS 97: 135-143 (2017) Link
2014	BW485	AAC Cameron (VB)	CWRS	AAFC Winnipeg	Sm1	7704	CJPS 96: 1065-1072 (2016) Link
2023	HY2129	AAC Camrose	CPSR	AAFC Lethbridge	Sm1	10111	--
2017	HY2021	AAC Castle (VB)	CPSR	AAFC Winnipeg & Lethbridge	Sm1	8590	CJPS 102: 278-284 (2022)	Link
2012	SWS408	AAC Chiffon (VB)	CWSWS	AAFC Lethbridge	Sm1	7359	CJPS 94: 1303-1308 (2014)	Link
2017	HW388	AAC Cirrus	CWHWS	AAFC Swift Current	--	8439	--
2014	PT245	AAC Connery	CWRS	AAFC Swift Current	DH	7751	CJPS 103: 512-518 (2023) Link
2015	HY1632	AAC Crossfield	CPSR	AAFC Winnipeg & Lethbridge	--	7870	CJPS 100: 239-244 (2020)	Link
2012	HY1603	AAC Crusader	CPSR	AAFC Winnipeg	--	7626	--
2012	DT813	AAC Current	CWAD	AAFC Swift Current	--	7312	CJPS 95: 589-594 (2015)	Link
2013	DT832	AAC Durafield	CWAD	AAFC Swift Current	DH	7478	CJPS 96: 719-725 (2016)	Link
2012	BW931	AAC Elie	CWRS	AAFC Swift Current	--	7362	CJPS 96: 919-927 (2016) Link
2015	HY1627	AAC Entice	CPSR	AAFC Winnipeg & Lethbridge	--	7871	--
2013	HY1610	AAC Foray (VB)	CPSR	AAFC Winnipeg	Sm1	7625	CJPS 95: 799-803 (2015)	Link
2012	HW021	AAC Iceberg	CWHWS	AAFC Winnipeg	--	7302	--
2011	GP047	AAC Innova	CWGP/CWSP (spring)	AAFC Lethbridge	--	7360	CJPS 95: 787-791 (2015) Link
2014	BW483	AAC Jatharia (VB)	CWRS	AAFC Winnipeg	Sm1	7735	CJPS 97: 368-376 (2017) Link
2015	SWS433	AAC Paramount (VB)	CWSWS	AAFC Lethbridge	Sm1	7872	CJPS 102: 258-264 (2022)	Link
2013	HY1319	AAC Penhold	CPSR	AAFC Swift Current	--	7565	CJPS 98: 207-217 (2018)	Link
2013	BW462	AAC Prevail (VB)	CWRS	AAFC Winnipeg	DH, Sm1	7452	CJPS 98: 475-482 (2018)	Link
2012	GP080	AAC Proclaim	CWGP/CWSP (spring)	AAFC Lethbridge	--	7307	CJPS 95: 1265-1269 (2015)	Link
2015	BW966	AAC Redberry	CWRS	AAFC Swift Current	DH	7921	CJPS 102: 496-504 (2022)	Link
2019	PT488	AAC Redstar	CWRS	AAFC Brandon	--	8923	CJPS 101: 274-283 (2021)	Link
2012	PT457	AAC Redwater	CWRS (CNHR 2021)	AAFC Winnipeg	reclass 2021	7231	CJPS 97: 1188-1194 (2017) Link
2012	HY1312	AAC Ryley	CPSR	AAFC Swift Current	--	7363	CJPS 97: 549-555 (2017)	Link
2014	DT844	AAC Spitfire	CWAD	AAFC Swift Current	--	7566	CJPS 97: 157-164 (2017) Link
2013	HY1615	AAC Tenacious (VB)	CPSR	AAFC Winnipeg	Sm1, FHB=R	7627	CJPS 95: 805-810 (2015)	Link
2014	BW487	AAC Tradition	CWGP (CNHR 2016)	AAFC Winnipeg	CGC veto against CWRS	7765	--
2015	BW965	AAC Viewfield	CWRS	AAFC Swift Current	DH	7919	CJPS 99: 102-110 (2019)	Link
2014	BW957	AAC W1876	CWRS	AAFC Swift Current	--	7608	CJPS 98: 799-808 (2018) Link
2013	HW027	AAC Whitefox	CWHWS	AAFC Winnipeg	--	7411	--
1998	BW691	AC Abbey	CWRS (CNHR 2018)	AAFC Swift Current	solid stem, reclass 2018	4794	CJPS 80: 123-127 (2000)	Link
2004	SWS241	AC Andrew	CWSWS	AAFC Lethbridge	DH, also see 2000	5798		Link
2000	SWS241 (3 yr IR)	AC Andrew	CWSWS	AAFC Lethbridge	DH, also see 2004	I-278	CS 44: 696-697 (2004)	Link
1994	BW661	AC Barrie	CWRS	AAFC Swift Current	--	3980	CJPS 76: 337-339 (1996) Link
1996	BW689	AC Cadillac	CWRS	AAFC Swift Current & Lethbridge	--	4376	CJPS 78: 459-462 (1998)	Link
1993	BW152	AC Cora	CWRS (CNHR 2018)	AAFC Winnipeg	reclass 2018	4021	CJPS 88: 157-160 (2008)	Link
1998	ES07	AC Corinne	CWES	AAFC Winnipeg	--	5010	CJPS 81: 741-743 (2001)	Link
1996	HY417	AC Crystal	CPSR (CNHR 2019)	AAFC Swift Current	reclass 2019	4378	CJPS 78: 307-310 (1998)	Link
1992	BW148	AC Domain	CWRS (CNHR 2021)	AAFC Winnipeg	reclass 2021	3858	CJPS 88: 347-350 (2008) Link
1993	BW642	AC Eatonia	CWRS (CNHR 2018)	AAFC Swift Current	solid stem, reclass 2018	3796	CJPS 74: 821-823 (1994)	Link
1996	BW685	AC Elsa	CWRS	AAFC Swift Current	--	4400	CJPS 77: 661-663 (1997)	Link
1994	HY392	AC Foremost	CPSR (CNHR 2018)	AAFC Swift Current & Lethbridge	reclass 2018	4148	CJPS 77: 657-660 (1997) Link
1997	BW693, PT401	AC Intrepid	CWRS	AAFC Swift Current	--	4627	CJPS 79: 375-378 (1999) Link
1994	HY395	AC Karma	CPSW	AAFC Swift Current	--	3991	CJPS 75: 899-901 (1995) Link
1995	BW173	AC Majestic	CWRS (CNHR 2018)	AAFC Winnipeg	reclass 2018	4245	--
2000	SWS234	AC Meena	CWSWS	AAFC Lethbridge	--	5300	CS 44: 697-698 (2004)	Link
1993	BW653	AC Michael	CWRS (CNHR 2018)	AAFC Lacombe	reclass 2018	3863	CJPS 75: 199-200 (1995)	Link
1990	BW120	AC Minto	CWRS (CNHR 2018)	AAFC Winnipeg	reclass 2018	3363	CJPS 73: 1091-1094 (1993)	Link
1997	SWS179	AC Nanda	CWSWS	AAFC Lethbridge	--	4688	CS 40: 579-580 (2000) Link
1994	SWS89	AC Phil	CWSWS	AAFC Lethbridge	--	4287	CS 40: 580-581 (2000) Link
1991	SWS87	AC Reed	CWSWS	AAFC Lethbridge	--	3499	CJPS 73: 531-534 (1993) Link
1996	BW191	AC Splendor	CWRS	AAFC Winnipeg	--	4534	CJPS 87: 883-887 (2008)	Link
1999	HY413	AC Vista	CPSW	AAFC Swift Current	also see 1996	4980	CJPS 78: 617-620 (1998) Link
1996	HY413 (3 yr IR)	AC Vista	CPSW	AAFC Swift Current	also see 1999	I-213	CJPS 78: 617-620 (1998)	Link
2003	HY446 (1 yr IR)	AC2000	CPSW	AAFC Swift Current	also see 2000	I-273	CJPS 82: 415-419 (2002) Link
2000	HY446 (3 yr IR)	AC2000	CPSW	AAFC Swift Current	also see 2003	I-273	CJPS 82: 415-419 (2002)	Link
1999	PT755	Alikat	CWRS (CNHR 2018)	U of AB	also see 1998	4969	--
1998	PT755 (3 yr IR)	Alikat	CWRS (CNHR 2018)	U of AB	reclass 2018, also see 1999	--	--
2006	PT213	Alvena	CWRS (CNHR 2018)	AAFC Swift Current	DH, reclass 2018	6183	CJPS 88: 513-518 (2008)	Link
1998	ES04	Amazon	CWES	U of MB	--	5003	--
1978	BW20	Benito	CWRS	AAFC Winnipeg	cancelled	1955	CJPS 61: 145-146 (1981)	Link
2002	SWS285	Bhishaj	CWSWS	AAFC Lethbridge	DH	5676	CJPS 91: 805-811 (2011)	Link
1989	HY368	Biggar	CPSR	AAFC Swift Current	cancelled 2002	3089	CJPS 71: 519-522 (1991) Link
1985	PT325, HY916, ES25	Bluesky	CU (CWES 1993)	AAFC Beaverlodge	--	2782	CJPS 74: 135-136 (1994) Link
2003	ES54	Burnside	CWES	AAFC Winnipeg	DH	5860	CJPS 90: 79-84 (2010) Link
1974	CT774	Canuck	CWRS	AAFC Swift Current	cancelled	1533	CJPS 55: 315-316 (1975)	Link
2009	BW874	Carberry	CWRS	AAFC Swift Current	DH	6661	CJPS 91: 529-534 (2011) Link
2011	BW429	Cardale	CWRS	AAFC Winnipeg	--	7045	CJPS 93: 307-313 (2013) Link
2006	BW824	CDC Abound	CWRS	U of SK - CDC	DH, AhasL-D1	6287	--
2004	BW301	CDC Alsask	CWRS	U of SK - CDC	--	5972	--
1999	BW720	CDC Bounty	CWRS	U of SK - CDC	--	5065	--
2014	DT574	CDC Carbide (VB)	CWAD	U of SK - CDC	Sm1	7580	CJPS 95: 1007-1012 (2015) Link
1995	S87-149, W275	CDC Clair	CWRW (CWGP/CWSP, 2013)(winter)	U of SK - CDC	reclass 2013	4813	CJPS 77: 669-671 (1997) Link
1998	S94-4, W325	CDC Falcon	CWRW (CWGP/CWSP 2014)(winter)	U of SK - CDC	reclass 2014	4821	CJPS 79: 599-601 (1999)	Link
2014	DT570	CDC Fortitude	CWAD	U of SK - CDC	solid stem, also see 2013	7563	CJPS 95: 1013-1019 (2015) Link
2013	DT570 (3 yr IR)	CDC Fortitude	CWAD	U of SK - CDC	solid stem, also see 2014	I-372	CJPS 95: 1013-1019 (2015)	Link
2003	BW781	CDC Go	CWRS	U of SK - CDC	--	5799	--
2015	PT588	CDC Hughes (VB)	CWRS	U of SK - CDC	semi-solid stem, Sm1	8003	--
2002	BW758	CDC Imagine	CWRS	U of SK - CDC & SK Wheat Pool	AhasL-D1	5570	--
2009	BW881	CDC Kernen	CWRS	U of SK - CDC	--	6805	--
2009	GP003	CDC NRG003	CWGP/CWSP (spring)	U of SK - CDC	--	6806	--
2003	PT555	CDC Osler	CWRS (CNHR 2018)	U of SK - CDC	reclass 2018	5800	--
2011	PT580	CDC Plentiful	CWRS	U of SK - CDC	--	7128	--
2012	GP062	CDC Primepurple	CWGP/CWSP(spring)	U of SK - CDC	purple grain	7448	--
2001	ES21	CDC Rama	CWES	U of SK - CDC	--	5406	--
1999	S95-4, W341	CDC Raptor	CWRW (CWGP/CWSP, 2013)(winter)	U of SK - CDC	reclass 2013	5041	CJPS 82: 407-409 (2002) Link
2009	BW880	CDC Stanley	CWRS	U of SK - CDC	--	6807	--
1991	BW616	CDC Teal	CWRS	U of SK - CDC	--	3436	CJPS 73: 193-197 (1993) Link
2009	PT575	CDC Thrive	CWRS	U of SK - CDC	AhasL-D1	6808	--
2015	GP131	CDC Throttle	CWGP/CWSP (spring)	U of SK - CDC	--	8071	--
2013	PT584	CDC Titanium (VB)	CWRS	U of SK - CDC	Sm1	7456	--
2009	BW883	CDC Utmost (VB)	CWRS	U of SK - CDC	Sm1	6809	--
2010	BW423	CDC VR Morris	CWRS	U of SK - CDC	--	7127	--
2003	ES41	CDC Walrus	CWES	U of SK - CDC	--	5801	--
2012	HW612	CDC Whitewood	CWHWS	U of SK - CDC	--	7450	--
2008	ES101	CDN Bison	CWES	AAFC Winnipeg	--	6662	--
2013	PT765	Coleman	CWRS	U of AB	--	7479	CJPS 95: 1037-1041 (2015)	Link
1982	BW55	Columbus	CWRS (CNHR 2018)	AAFC Winnipeg	BW37 replacement, reclass 2018	2009	CJPS 61: 147-148 (1981) Link
1980	BW37	Columbus	CWRS	AAFC Winnipeg	replaced with BW55 in 1982	2009	CJPS 61: 147-148 (1981) Link
2009	HY682	Conquer (VB)	CPSR (CNHR 2018)	AAFC Winnipeg	Sm1, reclass 2018	6784	CJPS 97: 147-152 (2017) Link
1985	BW569	Conway	CWRS (CNHR 2018)	U of SK	reclass 2018	2666	CJPS 72: 221-223 (1992) Link
1975	DT411	Coulter	CWAD	AAFC Winnipeg	cancelled	1721	CJPS 58: 551-552 (1978)	Link
1990	PT751	Cutler	CPSR	U of AB	--	3356	CJPS 72: 229-233 (1992)	Link
1962	CT740	Cypress	MB Hard-MB Northern/CWRS	AAFC Lethbridge	cancelled 1980	843	CJPS 43: 232-234 (1963)	Link
2011	HY694	Enchant (VB)	CPSR	AAFC Winnipeg	Sm1	7134	--
2009	DT787	Enterprise	CWAD	AAFC Swift Current	--	6629	CJPS 90: 353-357 (2010)	Link
2016	Faller	Faller	CNHR	NDSU / Seed Depot	also see 2015	8494	JPR 2: 224-229 (2008)	Link
2015	HY2015 (3 yr IR)	Faller	CWIW/CNHR	NDSU / Seed Depot	also see 2016	I-391	JPR 2: 224-229 (2008)	Link
1976	Fielder	Fielder	CWSWS	USDA ID / AAFC Lethbridge	cancelled 2002	1667	CS 15: 104 (1975)	Link
2007	BW365	Fieldstar (VB)	CWRS	AAFC Winnipeg	Sm1	6517	JPR 6: 161-168 (2012) Link
1972	HY100, ES01	Glenlea	CU (CWES 1993)	U of MB	reclass 1993	1395	CJPS 52: 1081-1082 (1972)	Link
2009	BW406	Glenn	CWRS	NDSU / Canterra	--	6571	CS 46: 473-474 (2006) Link
2014	PT769	Go Early	CWRS	U of AB	--	7700	--
2007	BW841	Goodeve (VB)	CWRS	AAFC Swift Current	Sm1	6342	CJPS 89: 937-944 (2009) Link
1993	BW166 (1 yr IR)	Grandin	CW EXPRMTL	NDSU / AAFC Winnipeg	#4704 (E. Canada, 1998), cancelle	I-130	--
2001	BW259	Harvest	CWRS (CNHR 2018)	AAFC Winnipeg	reclass 2018	5508	CJPS 90: 503-509 (2010) Link
2005	PT211	Helios	CWRS	AAFC Swift Current	--	6079	CJPS 87: 515-520 (2007) Link
1984	NB320, HY320	HY320	CPSR	AAFC Swift Current	cancelled	2479	CJPS 67: 807-811 (1987)	Link
2004	BW799	Infinity	CWRS	AAFC Swift Current	--	5864	CJPS 86: 737-742 (2006)	Link
1993	BW158	Invader	CWRS	AgriPro & United Grain Growers	cancelled 2002	3788	--
2001	BW243	Journey	CWRS	SK Wheat Pool	--	5436	CJPS 83: 807-811 (2005) Link
2006	BW263	Kanata	CWHWS	AAFC Winnipeg	DH, also see 2000 & 2004	6172	CJPS 87: 879-882 (2007)	Link
2004	BW263 (2 yr IR)	Kanata	CWHWS	AAFC Winnipeg	DH, also see 2000	I-282	CJPS 87: 879-882 (2007)	Link
2000	BW263 (3 yr IR)	Kanata	CWHWS	AAFC Winnipeg	DH, also see 2004	I-282	CJPS 87: 879-882 (2007)	Link
2006	BW342	Kane	CWRS (CNHR 2018)	AAFC Winnipeg	reclass 2018	6165	CJPS 87: 889-894 (2007)	Link
1981	BW49	Katepwa	CWRS (CNHR 2018)	AAFC Winnipeg	reclass 2018	2162	CJPS 67: 229-230 (1987)	Link
1985	BW571	Kenyon	CWRS	U of SK	cancelled	2556	CJPS 71: 1165-1168 (1991) Link
1985	BW572	Lancer	CWRS	AAFC Swift Current	solid stem, cancelled 2002	2536	CJPS 66: 409-412 (1986) Link
1999	PT754	Laser	CWES	U of AB	also see 1996	4922	--
1996	PT754 (3 yr IR)	Laser	CWES	U of AB	also see 1999	I-208	--
1986	BW593	Laura	CWRS	AAFC Swift Current	--	2730	CJPS 68: 203-206 (1988)	Link
1981	BW535	Leader	CWRS (CNHR 2018)	AAFC Swift Current	solid stem, reclass 2018	2085	CJPS 62: 231-232 (1982)	Link
2003	BW776	Lillian	CWRS (CNHR 2018)	AAFC Swift Current	DH, semi-solid stem, reclass 2018	5689	CJPS 85: 397-401 (2005) Link
2002	PT205	Lovitt	CWRS	AAFC Swift Current	--	5556	CJPS 84: 811-814 (2004)	Link
1965	CT263	Manitou	MB Hard-MB Northern/CWRS	AAFC Winnipeg	cancelled	958	CJPS 47: 330 (1967)	Link
1997	BW205	McKenzie	CWRS (CNHR 2018)	SK Wheat Pool	DH, semi-solid stem, reclass 2018	4638	CJPS 83: 565-569 (2003) Link
2008	GP018	Minnedosa	CWGP/CWSP (spring)	AAFC Winnipeg	--	6555	--
2010	S01-285-7*R	Moats	CWRW	U of SK - CDC	--	6903	CJPS 92: 191-193 (2012)	Link
2009	BW875	Muchmore	CWRS (CNHR 2021)	AAFC Swift Current	DH, reclass 2021	6660	CJPS 91: 797-803 (2011) Link
1972	CT432, BW7	Napayo	CWRS	AAFC Winnipeg	cancelled	1405	CJPS 61: 1431 (1981)	Link
1969	CT282, BW2	Neepawa	MB Hard-MB Northern/CWRS (CNHR 2018)	AAFC Winnipeg	former stat. check, reclass 2018	1193	CJPS 50: 752-753 (1970)	Link
1973	HY106	Norquay	CU	U of MB	HWS, cancelled 1980	1520	CJPS 54: 573 (1974)	Link
1976	WT80	Norstar	CWRW	AAFC Lethbridge	--	1771	CS 20: 552 (1980)	Link
1987	HY925, PT807	Oslo	CPSR (CNHR 2018)	NAPB / SK Wheat Pool	reclass 2018	2803	CJPS 70: 229-302 (1990) Link
1990	SWS09 (1 yr IR)	Owens	CWSWS	USDA ID / AAFC Lethbridge	also see 1985-1990	I-50	CS 24: 210-211 (1984)	Link
2015	PT772	Parata	CWRS	U of AB	--	7764	CJPS 96: 517-524 (2016)	Link
1962	CT427	Park	MB Hard-MB Northern/CWRS (CNHR 2018)	AAFC Lacombe	reclass 2018	870	CJPS 43: 617-618 (1963)	Link
1989	BW114	Pasqua	CWRS (CNHR 2018)	AAFC Winnipeg	reclass 2018	3273	CJPS 73: 1095-1098 (1993) Link
2011	GP032	Pasteur	CWGP/CWSP (spring)	Wiersum Plant Breeding / Plantomar	--	7031	--
2002	PT416	Peace	CWRS	AAFC Winnipeg	--	5861	CJPS 94: 1297-1302 (2014)	Link
1959	CT229	Pembina	MB Hard-MB Northern/CWRS (CNHR 2018)	AAFC Winnipeg	reclass 2018	770	CS 3: 457-458 (1963)	Link
1969	CT926, H926	Pitic 62	No. 6 Commercial/CU	CIMMYT / AAFC Winnipeg	cancelled 1990	1152	CS 12: 130-131 (1972)	Link
1990	DT606	Plenty	CWAD	U of SK - CDC	cancelled 2015	3301	CJPS 71: 501-503 (1991)	Link
1998	BW220	Prodigy	CWRS	SK Wheat Pool	--	4735	CJPS 83: 813-816 (2003)	Link
2016	Prosper	Prosper	CNHR	NDSU / Seed Depot	also see 2015	8493	JPR 7: 75-80 (2013)	Link
2015	HY2016 (3 yr IR)	Prosper	CWIW/CNHR	NDSU / Seed Depot	also see 2016	I-390	JPR 7: 75-80 (2013)	Link
2018	PT783	Rednet	CWRS	U of AB	DH	8628	--
1986	BW92	Roblin	CWRS	AAFC Winnipeg	--	2669	CJPS 67: 803-804 (1987)	Link
2006	SWS349	Sadash (VB)	CWSWS	AAFC Lethbridge	Sm1	6316	CJPS 89: 1099-1106 (2009)	Link
2004	BW264	Snowbird	CWHWS	AAFC Winnipeg	DH, also see 2000	5858	CJPS 87: 301-305 (2007)	Link
2000	BW264 (3 yr IR)	Snowbird	CWHWS	AAFC Winnipeg	DH, also see 2004	I-283	CJPS 87: 301-305 (2007)	Link
2009	HY475 (2 yr IR)	Snowhite475	CPSW	AAFC Swift Current	also see 2004	I-318	CJPS 87: 895-900 (2007) Link
2004	HY475 (3 yr IR)	Snowhite475	CPSW	AAFC Swift Current	also see 2009	I-318	CJPS 87: 895-900 (2007)	Link
2009	HY476 (2 yr IR)	Snowhite476	CPSW	AAFC Swift Current	also see 2004	I-319	CJPS 87: 521-526 (2007) Link
2004	HY476 (3 yr IR)	Snowhite476	CPSW	AAFC Swift Current	also see 2009	I-319	CJPS 87: 521-526 (2007)	Link
2009	BW315a	Snowstar	CWHWS	AAFC Winnipeg	DH, also see 2006	6603	CJPS 93: 143-148 (2013) Link
2006	BW315a (3 yr IR)	Snowstar	CWHWS	AAFC Winnipeg	DH, also see 2009	I-331	CJPS 93: 143-148 (2013)	Link
2004	BW307	Somerset	CWRS	AAFC Winnipeg	--	5961	CJPS 86: 163-167 (2006)	Link
1972	Springfield	Springfield	CWSWS	USDA ID / AAFC Lethbridge	not in minutes, cancelled 1982	1401	CS 12: 259 (1972)	Link
2008	BW867	Stettler	CWRS	AAFC Swift Current	DH	6516	CJPS 89: 945-951 (2009)	Link
2000	BW252	Superb	CWRS	AAFC Winnipeg	DH	5295	CJPS 90: 347-352 (2010)	Link
2013	GP087	SY087	CWGP/CWSP (spring)	Syngenta	--	7593	--
2011	BW433	SY433	CWRS	Syngenta	--	7208	--
2014	BW479	SY479 (VB)	CWRS	Syngenta	Sm1	7917	--
2014	PT637	SY637	CWRS	Syngenta	--	7918	--
2010	HY985	SY985	CPSR	Syngenta	--	7046	--
2013	HY995	SY995	CPSR	Syngenta	--	7592	--
2013	BW947	Thorsby	CWRS	U of AB	--	7584	--
2020	HY2082	UA Forefront	CPSR	U of AB	UA prefix added in 2023	9305	CJPS 102: 1217-1225 (2022) Link
2007	BW362	Unity (VB)	CWRS (CNHR 2018)	AAFC Winnipeg	Sm1, reclass 2018	6328	CJPS 90: 71-78 (2010) Link
2010	BW415	Vesper (VB)	CWRS (CNHR 2021)	AAFC Winnipeg	Sm1, reclass 2021	6890	CJPS 93: 315-321 (2013)	Link
2007	BW357	Waskada	CWRS	AAFC Winnipeg	DH	6317	CJPS 89: 929-936 (2009) Link
2013	WFT603	WFT 603	CWGP/CWSP (spring)	Western Feed Grain Devel. Coop.	--	7458	--
2012	HW024	Whitehawk	CWHWS	AAFC Winnipeg	also see 2011	7209	--
2011	HW024 (1 yr IR)	Whitehawk	CWHWS	AAFC Winnipeg	also see 2012	--	--
1985	PT329, HY917	Wildcat	CU (CWES 1993)	AAFC Beaverlodge	--	2761	CJPS 74: 133-134 (1994) Link
2008	BW859	WR859CL	CWRS	Syngenta	AhasL-D1	6616	--
2016	BW986	Zealand	CWRS	U of AB	--	8123	CJPS 98: 1409-1415 (2018)	Link
1979	no recommendations
1970	no recommendations
1966	no recommendations
1960	no recommendations
1957	no recommendations
1955	no recommendations
1951	no recommendations
1949	no recommendations
1945	no recommendations
